# Supplementary material for: Controllable growth of graphdiyne layered nanosheets for high-performance water oxidation
Source: Royal Society of Chemistry journal article supplement (doi:10.1039/d1qm00132a), 2021-01-01
Supplement: d1qm00132a1.pdf [file d1qm00132a1.pdf]

Supporting Figures

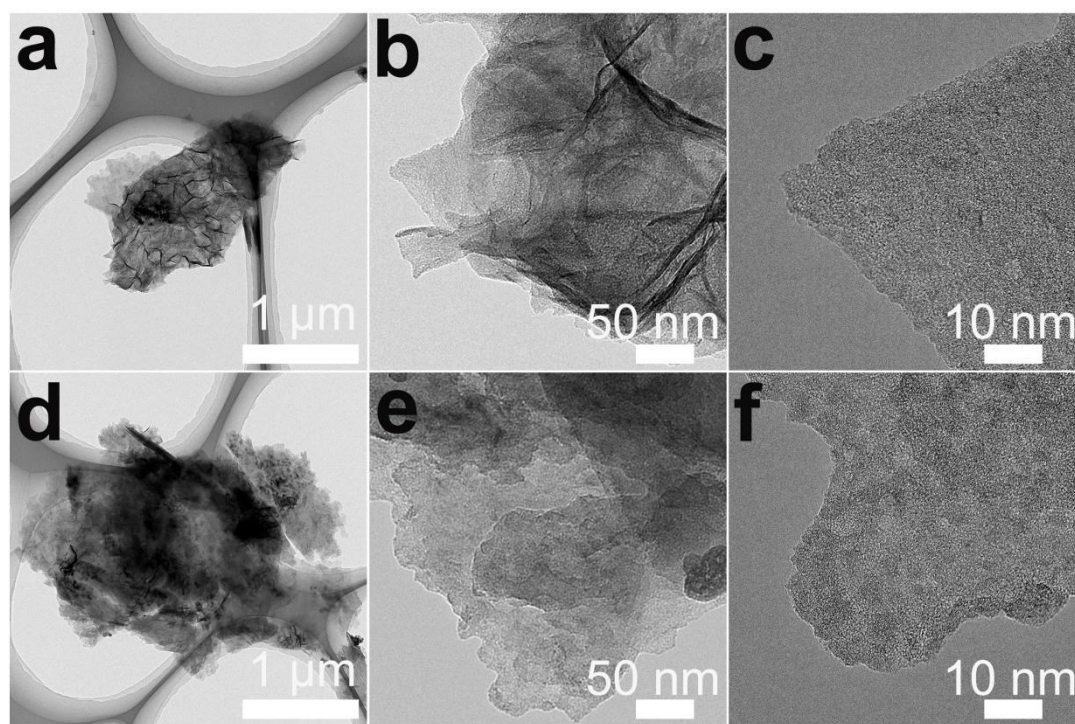

**Fig. S1.** Low- and high-magnified TEM images of (a-c) CeLDH/NF and (d-f) CeLDH@GDY/NF.

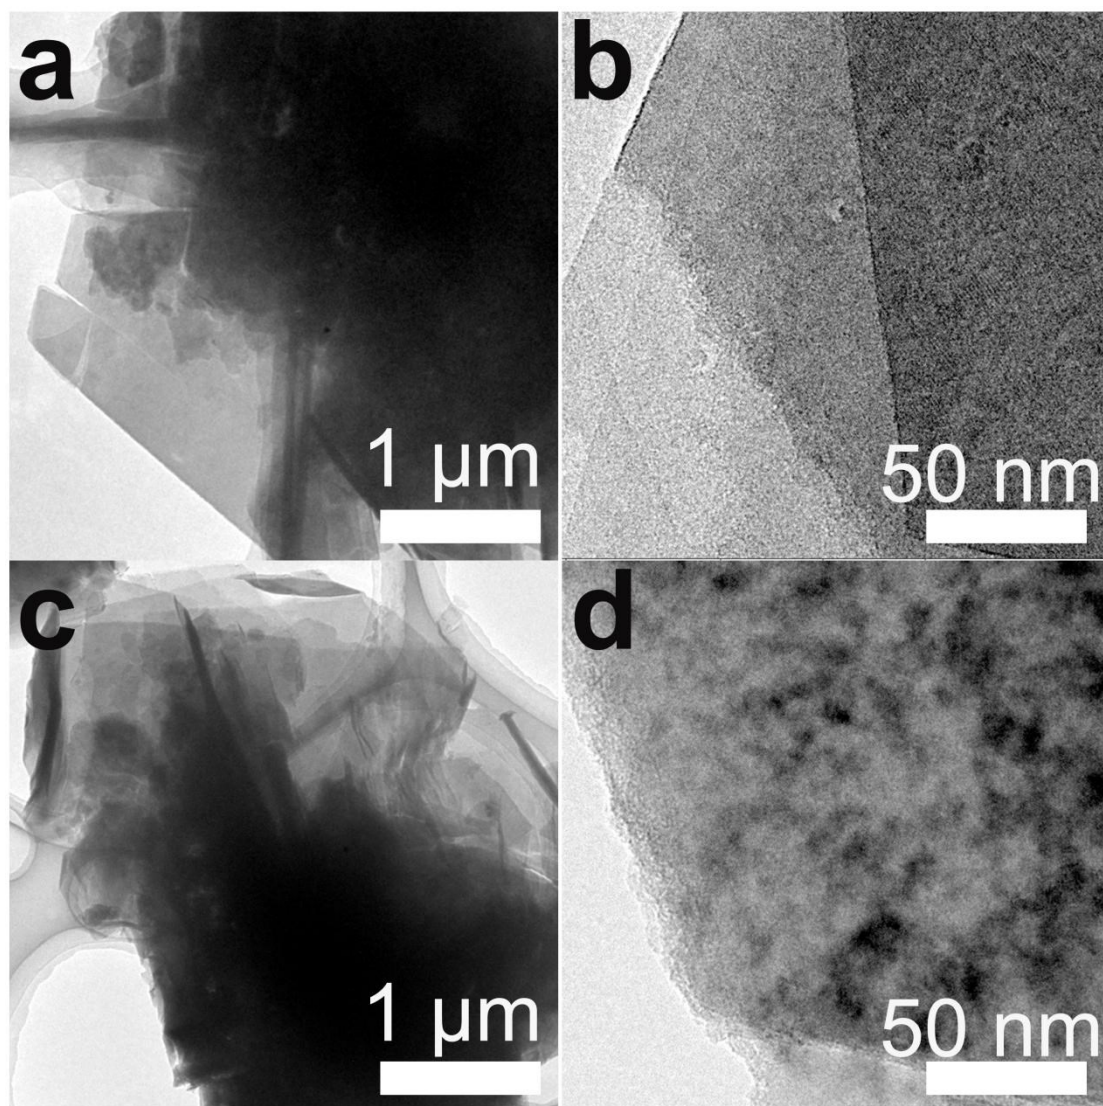

**Fig. S2.** Low- and high-magnified TEM images of (a-b) NiLDH/NF and (c-d) NiLDH@GDY/NF.

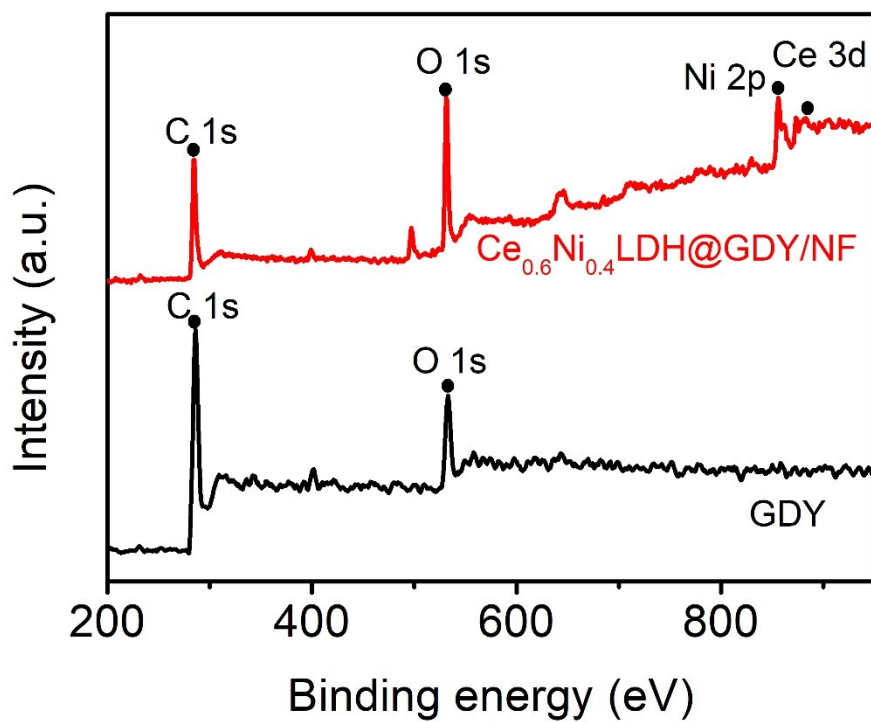

**Fig. S3.** XPS survey spectra of GDY (black line) and  $\text{Ce}_{0.6}\text{Ni}_{0.4}\text{LDH@GDY/NF}$  (red line).

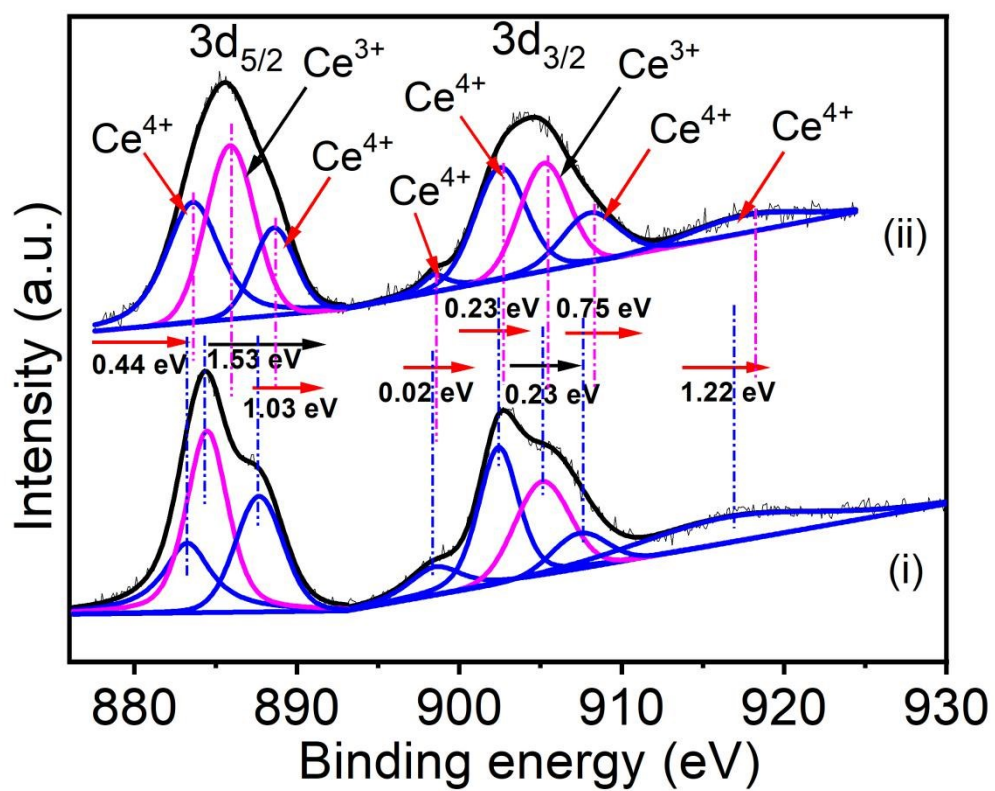

**Fig. S4.** Ce 3d XPS spectra for the catalyst of (i)  $\text{Ce}_{0.6}\text{Ni}_{0.4}\text{LDH@GDY}$  and (ii)  $\text{Ce}_{0.6}\text{Ni}_{0.4}\text{LDH@GDY/NF}$ .

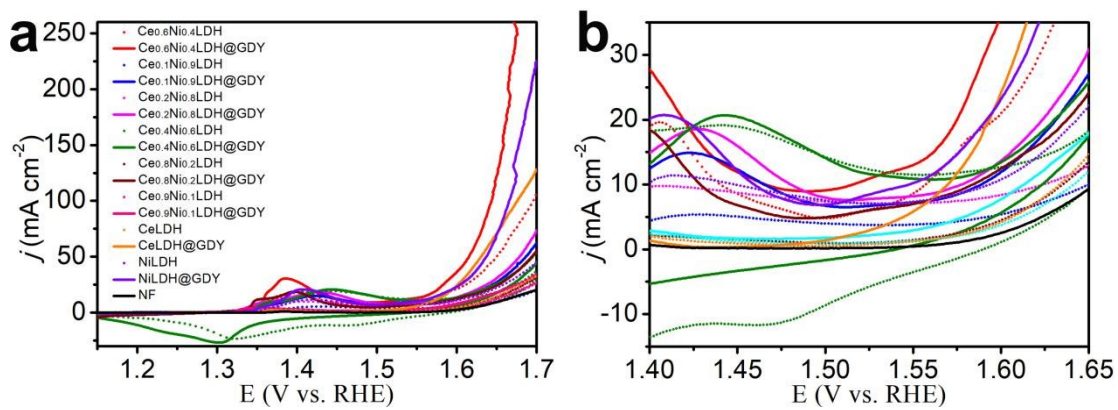

**Fig. S5.** (a) Polarization curves for  $\text{Ce}_x\text{Ni}_{1-x}\text{LDH/NF}$ ,  $\text{Ce}_x\text{Ni}_{1-x}\text{LDH@GDY/NF}$  and  $\text{NF}$ . (b) Magnifications of  $\text{Ce}_x\text{Ni}_{1-x}\text{LDH/NF}$ ,  $\text{Ce}_x\text{Ni}_{1-x}\text{LDH@GDY/NF}$  and  $\text{NF}$  curves.

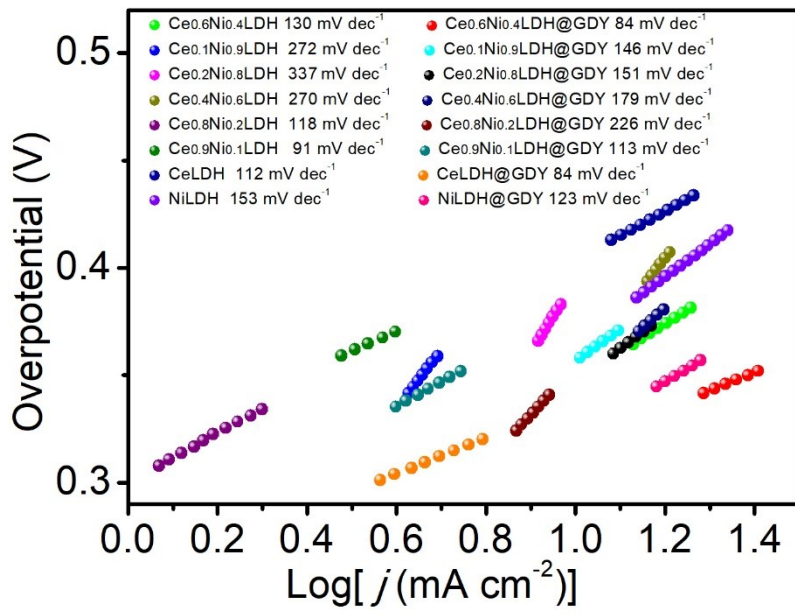

**Fig. S6.** Tafel plots of the as-synthesized catalysts.

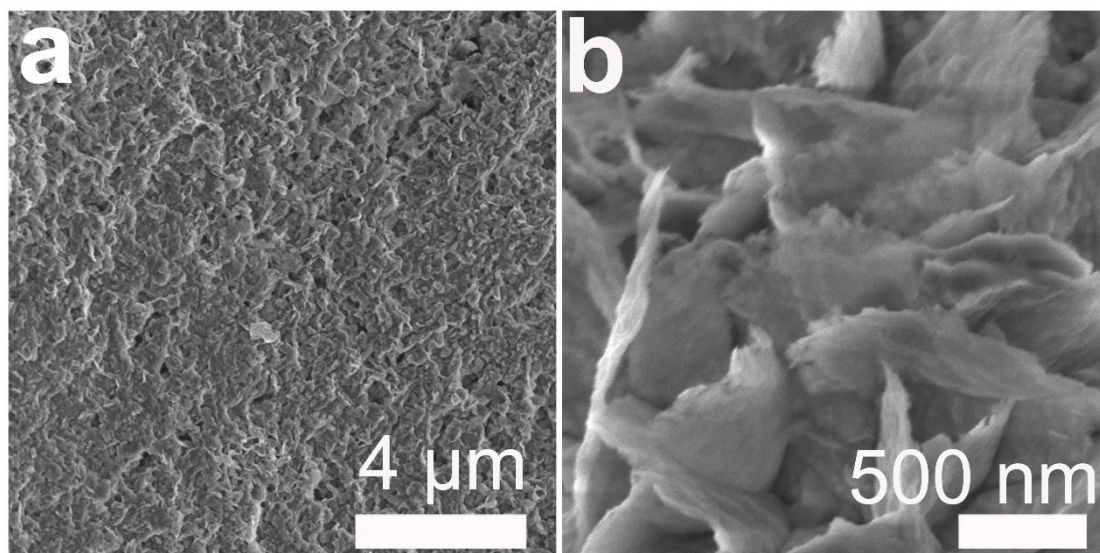

**Fig. S7.** (a) Low- and (b) high-magnification SEM images of  $\text{Ce}_{0.6}\text{Ni}_{0.4}\text{LDH@GDY/NF}$  recorded after OER cycling tests in 1.0 M KOH.

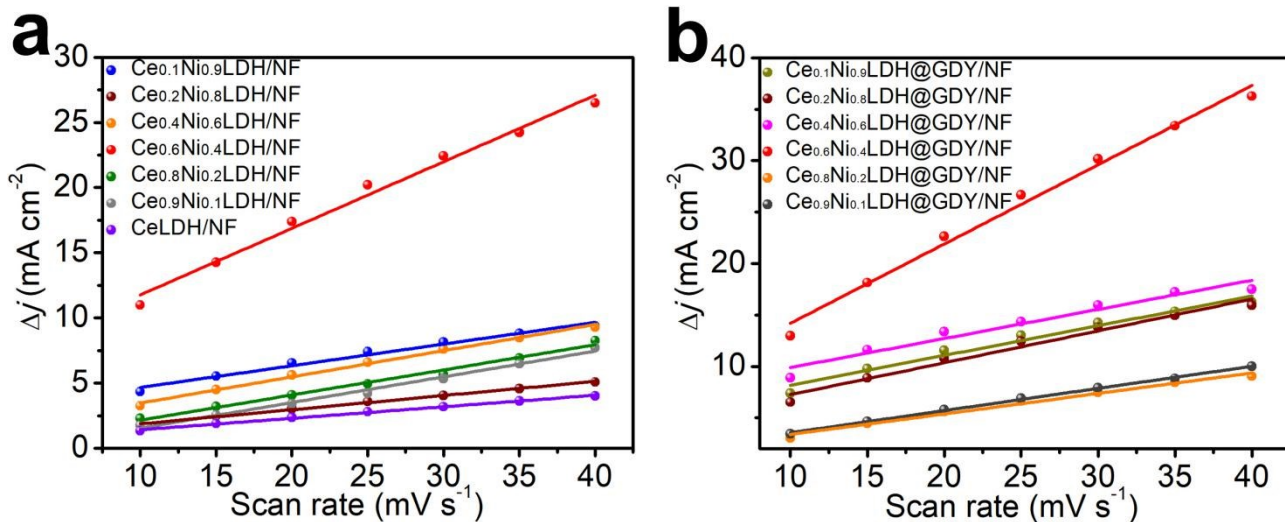

**Fig. S8.** Electrical-double-layer capacitances (Cdl) on the scan rates of  $Ce_xNi_{1-x}LDH/NF$  (a) and  $Ce_xNi_{1-x}LDH@GDY/NF$  (b).



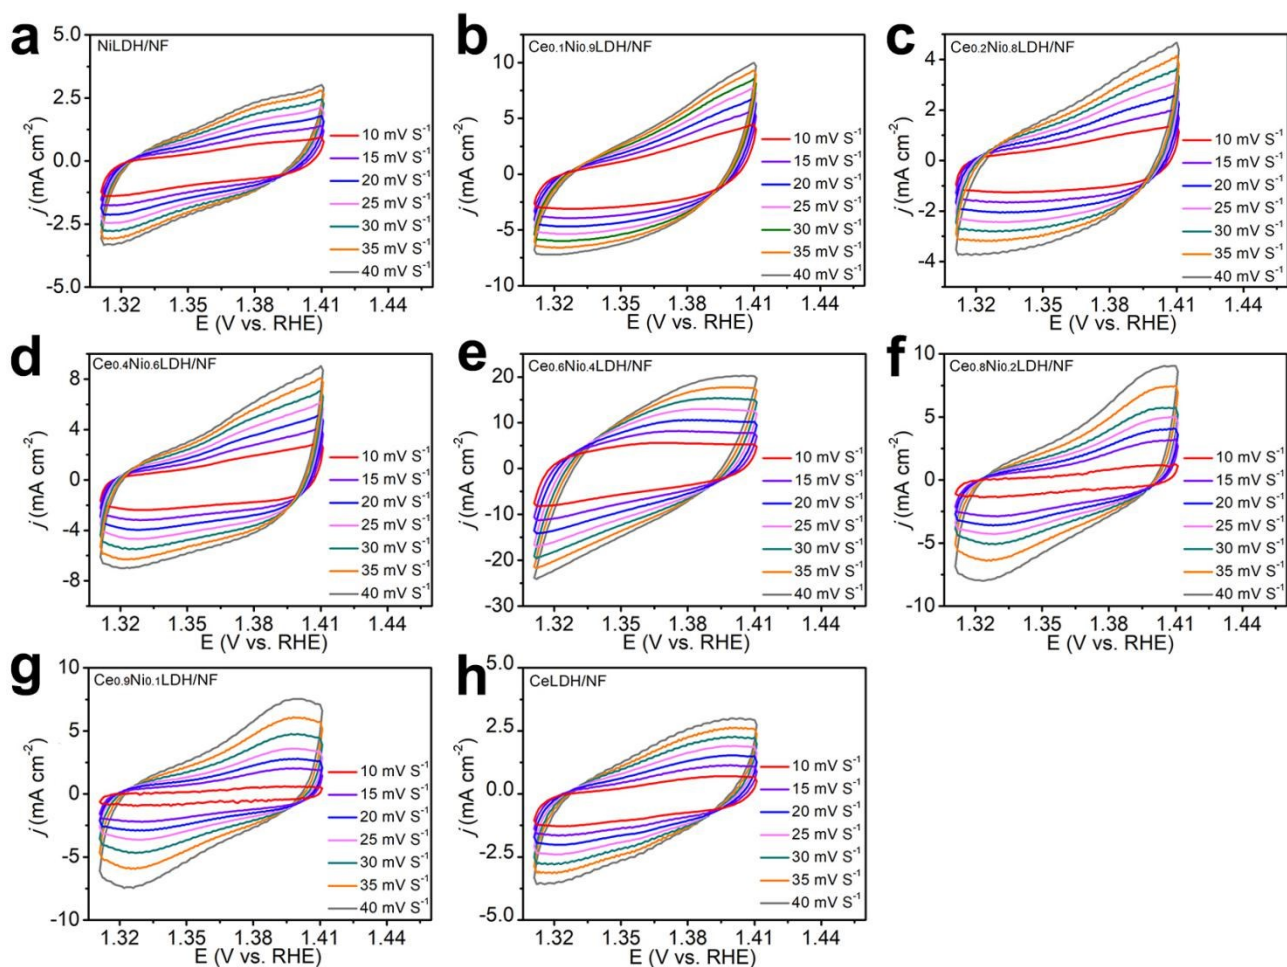

**Fig. S9.** CV curves of (a) NiLDH/NF, (b) Ce<sub>0.1</sub>Ni<sub>0.9</sub>LDH/NF, (c) Ce<sub>0.2</sub>Ni<sub>0.8</sub>LDH/NF, (d) Ce<sub>0.4</sub>Ni<sub>0.6</sub>LDH/NF, (e) Ce<sub>0.6</sub>Ni<sub>0.4</sub>LDH/NF, (f) Ce<sub>0.8</sub>Ni<sub>0.2</sub>LDH/NF, (g) Ce<sub>0.9</sub>Ni<sub>0.1</sub>LDH/NF and (h) NiLDH/NF of 10, 15, 20, 25, 30, 35, 40 mV S<sup>-1</sup>, respectively.

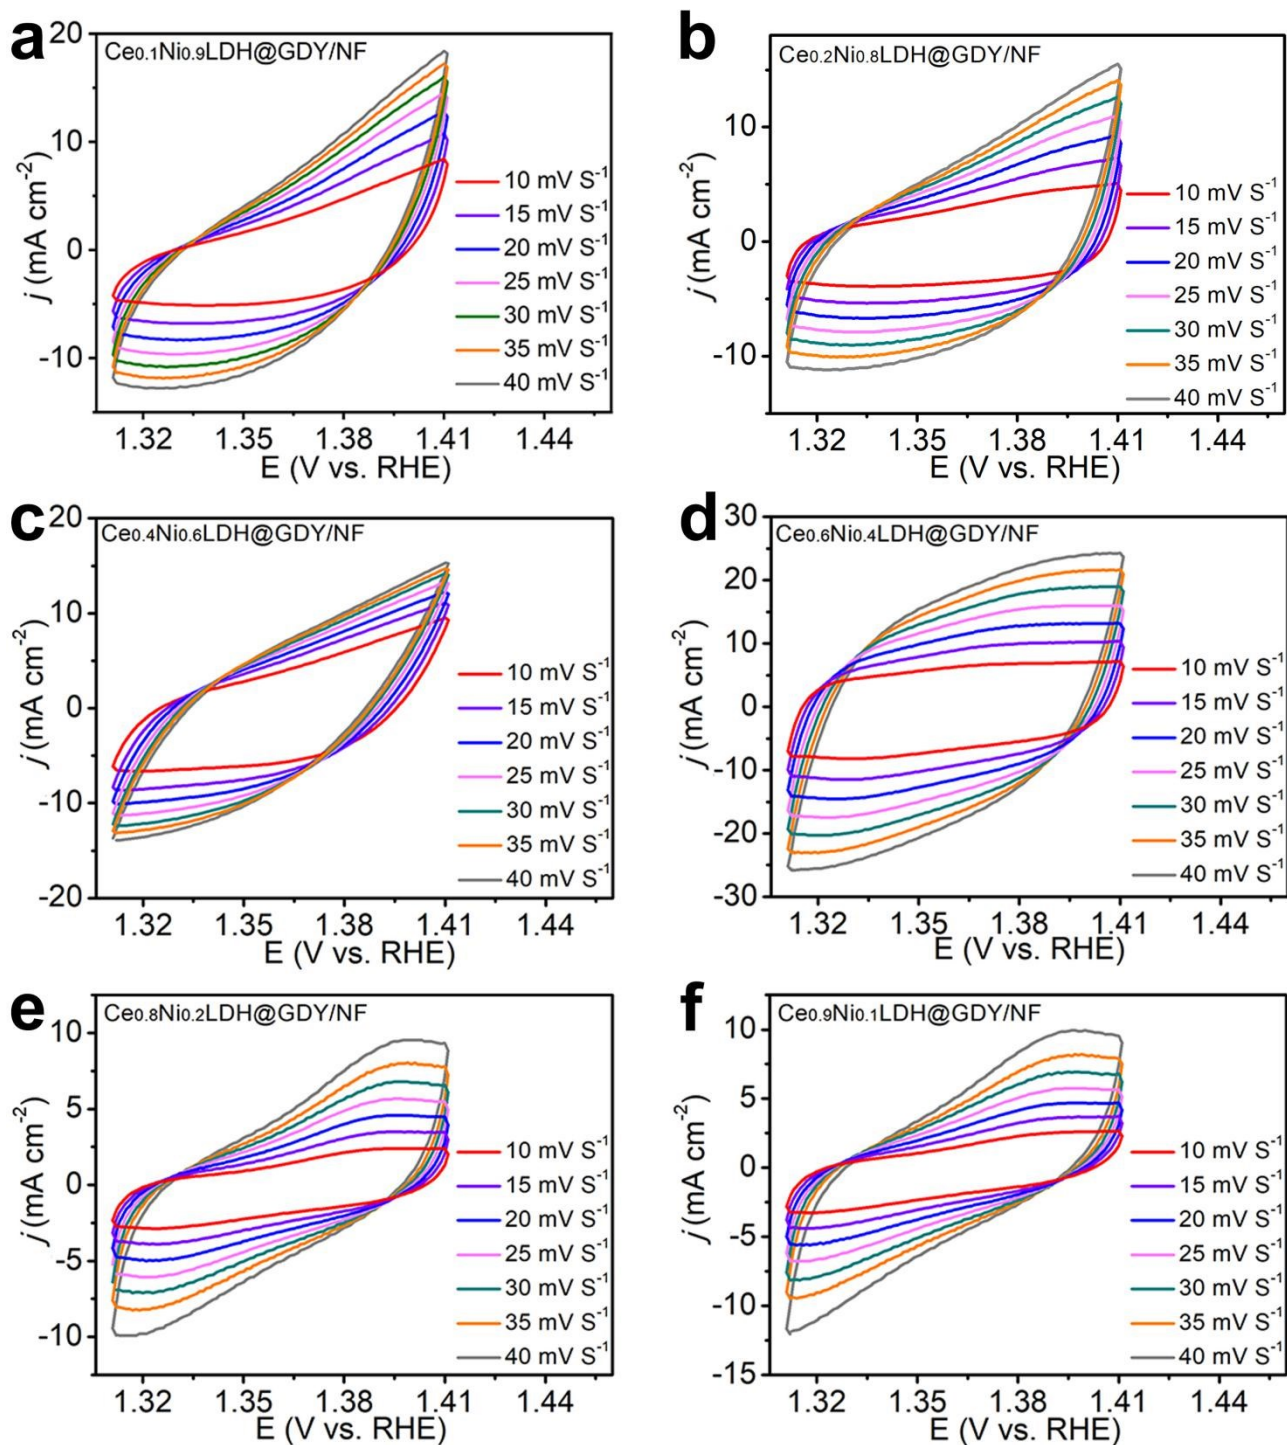

**Fig. S10.** CV curves of (a)  $\text{Ce}_{0.1}\text{Ni}_{0.9}\text{LDH@GDY/NF}$ , (b)  $\text{Ce}_{0.2}\text{Ni}_{0.8}\text{LDH@GDY/NF}$ , (c)  $\text{Ce}_{0.4}\text{Ni}_{0.6}\text{LDH@GDY/NF}$ , (d)  $\text{Ce}_{0.6}\text{Ni}_{0.4}\text{LDH@GDY/NF}$ , (e)  $\text{Ce}_{0.8}\text{Ni}_{0.2}\text{LDH@GDY/NF}$ , and (f)  $\text{Ce}_{0.9}\text{Ni}_{0.1}\text{LDH@GDY/NF}$  of 10, 15, 20, 25, 30, 35, 40  $\text{mV S}^{-1}$ , respectively.

**Table S1.** The OER overpotential of catalysts at different current densities.

| Catalyst                                       | $\eta$ 10 mA cm <sup>-2</sup> | $\eta$ 20mA cm <sup>-2</sup> | $\eta$ 40 mA cm <sup>-2</sup> | $\eta$ 60 mA cm <sup>-2</sup> |
|------------------------------------------------|-------------------------------|------------------------------|-------------------------------|-------------------------------|
| Ce <sub>0.6</sub> Ni <sub>0.4</sub> LDH@GDY/NF | 283                           | 342                          | 372                           | 390                           |
| Ce <sub>0.6</sub> Ni <sub>0.4</sub> LDH/NF     | 324                           | 364                          | 404                           | 428                           |
| Ce <sub>0.1</sub> Ni <sub>0.9</sub> LDH@GDY/NF | 356                           | 398                          | 440                           | 465                           |
| Ce <sub>0.1</sub> Ni <sub>0.9</sub> LDH/NF     | 418                           | 467                          | 511                           | 538                           |
| Ce <sub>0.2</sub> Ni <sub>0.8</sub> LDH@GDY/NF | 344                           | 390                          | 433                           | 456                           |
| Ce <sub>0.2</sub> Ni <sub>0.8</sub> LDH/NF     | 392                           | 450                          | 493                           | 518                           |
| Ce <sub>0.4</sub> Ni <sub>0.6</sub> LDH@GDY/NF | 391                           | 397                          | 448                           | 473                           |
| Ce <sub>0.4</sub> Ni <sub>0.6</sub> LDH/NF     | 420                           | 426                          | 473                           | 497                           |
| Ce <sub>0.8</sub> Ni <sub>0.2</sub> LDH@GDY/NF | 351                           | 405                          | 448                           | 473                           |
| Ce <sub>0.8</sub> Ni <sub>0.2</sub> LDH/NF     | 403                           | 438                          | 486                           | 520                           |
| Ce <sub>0.9</sub> Ni <sub>0.1</sub> LDH@GDY/NF | 381                           | 426                          | 481                           | 513                           |
| Ce <sub>0.9</sub> Ni <sub>0.1</sub> LDH/NF     | 409                           | 446                          | 501                           | 539                           |
| CeLDH@GDY/NF                                   | 337                           | 361                          | 387                           | 407                           |
| CeLDH/NF                                       | 401                           | 434                          | 487                           | 537                           |
| NiLDH@GDY/NF                                   | 300                           | 359                          | 395                           | 415                           |
| NiLDH/NF                                       | 361                           | 411                          | 459                           | 487                           |
| RuO <sub>2</sub> /NF                           | 334                           | 382                          | 464                           | 527                           |
| NF                                             | 422                           | 466                          | 559                           | 625                           |

**Table S2.** The tafel slope of electrocatalysts.

| Catalyst                                       | Tafel Slope (mV dec <sup>-1</sup> ) |
|------------------------------------------------|-------------------------------------|
| Ce <sub>0.6</sub> Ni <sub>0.4</sub> LDH@GDY/NF | 84                                  |
| Ce <sub>0.6</sub> Ni <sub>0.4</sub> LDH/NF     | 130                                 |
| Ce <sub>0.1</sub> Ni <sub>0.9</sub> LDH@GDY/NF | 146                                 |
| Ce <sub>0.1</sub> Ni <sub>0.9</sub> LDH/NF     | 272                                 |
| Ce <sub>0.2</sub> Ni <sub>0.8</sub> LDH@GDY/NF | 151                                 |
| Ce <sub>0.2</sub> Ni <sub>0.8</sub> LDH/NF     | 337                                 |
| Ce <sub>0.4</sub> Ni <sub>0.6</sub> LDH@GDY/NF | 179                                 |
| Ce <sub>0.4</sub> Ni <sub>0.6</sub> LDH/NF     | 270                                 |
| Ce <sub>0.8</sub> Ni <sub>0.2</sub> LDH@GDY/NF | 226                                 |
| Ce <sub>0.8</sub> Ni <sub>0.2</sub> LDH/NF     | 118                                 |
| Ce <sub>0.9</sub> Ni <sub>0.1</sub> LDH@GDY/NF | 113                                 |
| Ce <sub>0.9</sub> Ni <sub>0.1</sub> LDH/NF     | 91                                  |
| CeLDH@GDY/NF                                   | 84                                  |
| CeLDH/NF                                       | 112                                 |
| NiLDH@GDY/NF                                   | 123                                 |
| NiLDH/NF                                       | 153                                 |
| RuO <sub>2</sub> /NF                           | 74.7                                |

**Table S3.** Comparison of the OER performance of Ce<sub>0.6</sub>Ni<sub>0.4</sub>LDH@GDY/NF with reported electrocatalysts

| Catalyst                                           | Electrolytes | $\eta$ (mV) at 10 mA cm <sup>-2</sup> | Ref.                                      |
|----------------------------------------------------|--------------|---------------------------------------|-------------------------------------------|
| Ce <sub>0.6</sub> Ni <sub>0.4</sub> LDH@GDY/NF     | 1 M KOH      | 283                                   | This work                                 |
| 10% F/BCN                                          | 0.5 M NaOH   | 390                                   | J. Am. Chem. Soc. 2021, 143, 2, 1203-1215 |
| HXP@NC800                                          | 1 M KOH      | 307                                   | J. Am. Chem. Soc. 2020, 142, 7317–7321    |
| Co– N–C on CC                                      | 1 M KOH      | 321                                   | J. Am. Chem. Soc. 2019, 141, 14190–14199  |
| LaFexNi <sub>1-x</sub> O <sub>3</sub>              | 1 M KOH      | 302                                   | Angew. Chem. Int. Ed. 2019, 58, 2316.     |
| Co <sub>3</sub> O <sub>4</sub> /Co-Fe oxide DSNBs  | 1 M KOH      | 297                                   | Adv. Mater. 2018, 30, 1801211.            |
| CoNi/CoNiO <sub>2</sub>                            | 1 M KOH      | 341                                   | Adv. Mater. 2018, 30, 1705442.            |
| CoN <sub>x</sub> /CoO <sub>x</sub>                 | 0.1 M KOH    | 350                                   | Adv. Mater. 2018, 30, 1705431.            |
| Co <sub>3</sub> O <sub>4</sub> /CoFeO <sub>x</sub> | 1 M KOH      | 297                                   | Adv. Mater. 2018, 30, 1801211.            |
| NiCoPO/NC                                          | 1.0 M KOH    | 300                                   | Nano Energy 2020, 69, 104453              |
| Ni-CoP                                             | 1 M KOH      | 290                                   | Nano Lett. 2021, 21, 823-832              |
| MnSAC                                              | 0.1 M KOH    | 350                                   | Nano Lett. 2020, 20, 5443–5450            |
| Co/Co <sub>3</sub> O <sub>4</sub>                  | 1 M KOH      | 333                                   | ACS Catal. 2018, 8, 7879-7888.            |

**Table S4.** The electrochemical active surface areas (ECSAs) and electrical-double-layer capacitances ( $C_{dl}$ ) values of the catalysts.

| Catalyst                                       | $C_{dl}$ (mF cm <sup>-2</sup> ) | ECSA (cm <sup>2</sup> ) |
|------------------------------------------------|---------------------------------|-------------------------|
| Ce <sub>0.1</sub> Ni <sub>0.9</sub> LDH@GDY/NF | 144.3                           | 721.5                   |
| Ce <sub>0.2</sub> Ni <sub>0.8</sub> LDH@GDY/NF | 155.1                           | 775.5                   |
| Ce <sub>0.4</sub> Ni <sub>0.6</sub> LDH@GDY/NF | 141.5                           | 707.5                   |
| Ce <sub>0.6</sub> Ni <sub>0.4</sub> LDH@GDY/NF | 385.2                           | 1926                    |
| Ce <sub>0.8</sub> Ni <sub>0.2</sub> LDH@GDY/NF | 99.6                            | 498                     |
| Ce <sub>0.9</sub> Ni <sub>0.1</sub> LDH@GDY/NF | 107.7                           | 538.5                   |
| NiLDH/NF                                       | 34.9                            | 174.5                   |
| CeLDH/NF                                       | 44.2                            | 221                     |
| Ce <sub>0.1</sub> Ni <sub>0.9</sub> LDH/NF     | 83.2                            | 416                     |
| Ce <sub>0.2</sub> Ni <sub>0.8</sub> LDH/NF     | 50.4                            | 303                     |
| Ce <sub>0.4</sub> Ni <sub>0.6</sub> LDH/NF     | 100.8                           | 504                     |
| Ce <sub>0.6</sub> Ni <sub>0.4</sub> LDH/NF     | 255.1                           | 1275.5                  |
| Ce <sub>0.8</sub> Ni <sub>0.2</sub> LDH/NF     | 96.3                            | 483                     |
| Ce <sub>0.9</sub> Ni <sub>0.1</sub> LDH/NF     | 98.6                            | 493                     |
